# Supplementary material
Source: publisher figshare collection journal article supplement (https://acs.figshare.com/ndownloader/files/4734739)
Supplement: Supplementary file 1 [file 4734739]

 
data_hklf4_1
 
_audit_creation_method            SHELXL-97
_chemical_name_systematic
;
 ?
;
_chemical_name_common             ?
_chemical_melting_point           ?
_chemical_formula_moiety          ?
_chemical_formula_sum
 'C15 H24 N6 O6'
_chemical_formula_weight          384.40
 
loop_
 _atom_type_symbol
 _atom_type_description
 _atom_type_scat_dispersion_real
 _atom_type_scat_dispersion_imag
 _atom_type_scat_source
 'C'  'C'   0.0033   0.0016
 'International Tables Vol C Tables 4.2.6.8 and 6.1.1.4'
 'H'  'H'   0.0000   0.0000
 'International Tables Vol C Tables 4.2.6.8 and 6.1.1.4'
 'N'  'N'   0.0061   0.0033
 'International Tables Vol C Tables 4.2.6.8 and 6.1.1.4'
 'O'  'O'   0.0106   0.0060
 'International Tables Vol C Tables 4.2.6.8 and 6.1.1.4'
 
_symmetry_cell_setting            triclinic
_symmetry_space_group_name_H-M    'P -1'
 
loop_
 _symmetry_equiv_pos_as_xyz
 'x, y, z'
 '-x, -y, -z'
 
_cell_length_a                    6.3387(7)
_cell_length_b                    9.7240(10)
_cell_length_c                    15.889(2)
_cell_angle_alpha                 84.087(7)
_cell_angle_beta                  79.926(7)
_cell_angle_gamma                 88.509(6)
_cell_volume                      959.10(19)
_cell_formula_units_Z             2
_cell_measurement_temperature     173(2)
_cell_measurement_reflns_used     3595
_cell_measurement_theta_min       2.37
_cell_measurement_theta_max       24.68
 
_exptl_crystal_description        plate
_exptl_crystal_colour             colourless
_exptl_crystal_size_max           0.30
_exptl_crystal_size_mid           0.15
_exptl_crystal_size_min           0.05
_exptl_crystal_density_meas       ?
_exptl_crystal_density_diffrn     1.331
_exptl_crystal_density_method     'not measured'
_exptl_crystal_F_000              408
_exptl_absorpt_coefficient_mu     0.104
_exptl_absorpt_correction_type    multi-scan
_exptl_absorpt_correction_T_min   0.554
_exptl_absorpt_correction_T_max   0.995
_exptl_absorpt_process_details    ?
 
_exptl_special_details
;
 ?
;
 
_diffrn_ambient_temperature       173(2)
_diffrn_radiation_wavelength      0.71073
_diffrn_radiation_type            MoK\a
_diffrn_radiation_source          'fine-focus sealed tube'
_diffrn_radiation_monochromator   graphite
_diffrn_measurement_device_type   'Bruker X8 APEX'
_diffrn_measurement_method        'area detector'
_diffrn_detector_area_resol_mean  ?
_diffrn_standards_number          ?
_diffrn_standards_interval_count  ?
_diffrn_standards_interval_time   ?
_diffrn_standards_decay_%         ?
_diffrn_reflns_number             12078
_diffrn_reflns_av_R_equivalents   0.0680
_diffrn_reflns_av_sigmaI/netI     0.0419
_diffrn_reflns_limit_h_min        -7
_diffrn_reflns_limit_h_max        7
_diffrn_reflns_limit_k_min        -11
_diffrn_reflns_limit_k_max        11
_diffrn_reflns_limit_l_min        -19
_diffrn_reflns_limit_l_max        19
_diffrn_reflns_theta_min          2.11
_diffrn_reflns_theta_max          25.26
_reflns_number_total              12078
_reflns_number_gt                 8116
_reflns_threshold_expression      >2sigma(I)
 
_computing_data_collection        ?
_computing_cell_refinement        ?
_computing_data_reduction         ?
_computing_structure_solution     ?
_computing_structure_refinement   'SHELXL-97 (Sheldrick, 1997)'
_computing_molecular_graphics     ?
_computing_publication_material   ?
 
_refine_special_details
;
 Refinement of F^2^ against ALL reflections.  The weighted R-factor wR and
 goodness of fit S are based on F^2^, conventional R-factors R are based
 on F, with F set to zero for negative F^2^. The threshold expression of
 F^2^ > 2sigma(F^2^) is used only for calculating R-factors(gt) etc. and is
 not relevant to the choice of reflections for refinement.  R-factors based
 on F^2^ are statistically about twice as large as those based on F, and R-
 factors based on ALL data will be even larger.
;
 
_refine_ls_structure_factor_coef  Fsqd
_refine_ls_matrix_type            full
_refine_ls_weighting_scheme       calc
_refine_ls_weighting_details
 'calc w=1/[\s^2^(Fo^2^)+(0.1371P)^2^+0.2277P] where P=(Fo^2^+2Fc^2^)/3'
_atom_sites_solution_primary      direct
_atom_sites_solution_secondary    difmap
_atom_sites_solution_hydrogens    geom
_refine_ls_hydrogen_treatment     mixed
_refine_ls_extinction_method      none
_refine_ls_extinction_coef        ?
_refine_ls_number_reflns          12078
_refine_ls_number_parameters      274
_refine_ls_number_restraints      0
_refine_ls_R_factor_all           0.1016
_refine_ls_R_factor_gt            0.0664
_refine_ls_wR_factor_ref          0.2326
_refine_ls_wR_factor_gt           0.2038
_refine_ls_goodness_of_fit_ref    1.084
_refine_ls_restrained_S_all       1.084
_refine_ls_shift/su_max           0.001
_refine_ls_shift/su_mean          0.000
 
loop_
 _atom_site_label
 _atom_site_type_symbol
 _atom_site_fract_x
 _atom_site_fract_y
 _atom_site_fract_z
 _atom_site_U_iso_or_equiv
 _atom_site_adp_type
 _atom_site_occupancy
 _atom_site_symmetry_multiplicity
 _atom_site_calc_flag
 _atom_site_refinement_flags
 _atom_site_disorder_assembly
 _atom_site_disorder_group
C1 C 0.3232(3) -0.05310(19) 0.39247(14) 0.0274(5) Uani 1 1 d . . .
C2 C 0.3221(2) 0.19529(18) 0.39607(13) 0.0231(4) Uani 1 1 d . . .
C3 C 0.3214(3) 0.43137(19) 0.39159(13) 0.0264(5) Uani 1 1 d . . .
C4 C 0.2253(3) 0.30146(19) 0.52854(13) 0.0254(5) Uani 1 1 d . . .
C5 C 0.2568(2) 0.17868(18) 0.48562(12) 0.0231(4) Uani 1 1 d . . .
C6 C 0.2245(3) 0.0447(2) 0.53172(14) 0.0265(5) Uani 1 1 d . . .
C7 C 0.4338(3) 0.0939(2) 0.25704(14) 0.0318(5) Uani 1 1 d . . .
H7A H 0.4998 0.0056 0.2394 0.038 Uiso 1 1 calc R . .
H7B H 0.5452 0.1661 0.2422 0.038 Uiso 1 1 calc R . .
C8 C 0.2525(3) 0.1322(2) 0.20759(15) 0.0397(6) Uani 1 1 d . . .
H8A H 0.2031 0.2275 0.2176 0.048 Uiso 1 1 calc R . .
H8B H 0.1307 0.0693 0.2298 0.048 Uiso 1 1 calc R . .
C9 C 0.3186(3) 0.1238(3) 0.11110(15) 0.0422(6) Uani 1 1 d . . .
H9A H 0.4509 0.1778 0.0901 0.051 Uiso 1 1 calc R . .
H9B H 0.3511 0.0263 0.1005 0.051 Uiso 1 1 calc R . .
C10 C 0.1452(4) 0.1784(3) 0.06082(16) 0.0505(7) Uani 1 1 d . . .
H10A H 0.0105 0.1291 0.0858 0.061 Uiso 1 1 calc R . .
H10B H 0.1205 0.2774 0.0691 0.061 Uiso 1 1 calc R . .
C11 C 0.1910(4) 0.1647(3) -0.03496(16) 0.0505(7) Uani 1 1 d . . .
H11A H 0.2122 0.0657 -0.0440 0.061 Uiso 1 1 calc R . .
H11B H 0.3260 0.2133 -0.0606 0.061 Uiso 1 1 calc R . .
C12 C 0.0121(4) 0.2236(3) -0.08109(17) 0.0598(7) Uani 1 1 d . . .
H12A H -0.0120 0.3217 -0.0703 0.072 Uiso 1 1 calc R . .
H12B H -0.1217 0.1730 -0.0565 0.072 Uiso 1 1 calc R . .
C13 C 0.0587(5) 0.2145(3) -0.17809(17) 0.0699(8) Uani 1 1 d . . .
H13A H 0.1886 0.2666 -0.2033 0.105 Uiso 1 1 calc R . .
H13B H -0.0624 0.2536 -0.2036 0.105 Uiso 1 1 calc R . .
H13C H 0.0797 0.1175 -0.1894 0.105 Uiso 1 1 calc R . .
C14 C -0.1743(3) 0.3418(2) 0.36153(14) 0.0288(5) Uani 1 1 d . . .
H14 H -0.1633 0.2565 0.3367 0.035 Uiso 1 1 calc R . .
C15 C -0.3775(5) 0.4740(3) 0.1258(2) 0.0671(8) Uani 1 1 d . . .
H15 H -0.3926 0.4591 0.0690 0.081 Uiso 1 1 calc R . .
N1 N 0.3595(2) 0.07942(15) 0.35103(10) 0.0258(4) Uani 1 1 d . . .
N2 N 0.3544(2) 0.31698(16) 0.34890(11) 0.0280(4) Uani 1 1 d . . .
N3 N 0.2610(2) 0.42464(16) 0.47937(11) 0.0264(4) Uani 1 1 d . . .
N4 N 0.2608(2) -0.06409(17) 0.48029(11) 0.0259(4) Uani 1 1 d . . .
N5 N 0.3495(3) 0.55316(19) 0.34706(14) 0.0332(4) Uani 1 1 d . . .
N6 N 0.1631(3) 0.3015(2) 0.61188(13) 0.0332(4) Uani 1 1 d . . .
O1 O 0.3484(2) -0.15594(14) 0.35251(9) 0.0370(4) Uani 1 1 d . . .
O2 O 0.1685(2) 0.01859(14) 0.61054(10) 0.0331(4) Uani 1 1 d . . .
O3 O -0.20393(19) 0.33540(13) 0.44282(9) 0.0313(4) Uani 1 1 d . . .
O4 O -0.1581(2) 0.44955(14) 0.31104(9) 0.0352(4) Uani 1 1 d . . .
O5 O -0.2119(3) 0.4143(2) 0.15456(14) 0.0742(7) Uani 1 1 d . . .
O6 O -0.5105(3) 0.5447(2) 0.16339(13) 0.0651(5) Uani 1 1 d . . .
H4N H 0.246(3) -0.156(3) 0.5105(15) 0.049(6) Uiso 1 1 d . . .
H5A H 0.397(3) 0.556(2) 0.2874(18) 0.044(7) Uiso 1 1 d . . .
H5B H 0.331(4) 0.629(3) 0.3733(19) 0.073(9) Uiso 1 1 d . . .
H6B H 0.143(3) 0.223(2) 0.6442(13) 0.025(5) Uiso 1 1 d . . .
H6A H 0.155(3) 0.381(3) 0.6368(15) 0.045(7) Uiso 1 1 d . . .
H5O H -0.209(5) 0.425(4) 0.214(3) 0.109(13) Uiso 1 1 d . . .
H3O H 0.249(3) 0.498(3) 0.5098(15) 0.047(7) Uiso 1 1 d . . .
 
loop_
 _atom_site_aniso_label
 _atom_site_aniso_U_11
 _atom_site_aniso_U_22
 _atom_site_aniso_U_33
 _atom_site_aniso_U_23
 _atom_site_aniso_U_13
 _atom_site_aniso_U_12
C1 0.0211(9) 0.0211(11) 0.0412(14) -0.0041(10) -0.0087(8) -0.0005(7)
C2 0.0163(8) 0.0189(10) 0.0364(13) -0.0075(9) -0.0082(8) 0.0005(7)
C3 0.0195(9) 0.0229(11) 0.0387(13) -0.0084(9) -0.0071(8) 0.0007(7)
C4 0.0192(8) 0.0234(11) 0.0357(13) -0.0069(9) -0.0081(8) -0.0004(7)
C5 0.0192(8) 0.0191(10) 0.0334(12) -0.0064(9) -0.0086(8) 0.0001(7)
C6 0.0198(9) 0.0260(11) 0.0364(14) -0.0069(10) -0.0099(8) 0.0005(7)
C7 0.0345(10) 0.0225(11) 0.0384(14) -0.0124(10) -0.0010(9) 0.0012(8)
C8 0.0394(11) 0.0405(14) 0.0404(16) -0.0110(12) -0.0056(10) -0.0007(9)
C9 0.0493(13) 0.0407(14) 0.0367(15) -0.0105(12) -0.0041(10) -0.0007(10)
C10 0.0541(14) 0.0583(18) 0.0402(17) -0.0096(14) -0.0093(11) 0.0034(11)
C11 0.0651(15) 0.0466(17) 0.0404(17) -0.0071(13) -0.0084(12) -0.0040(12)
C12 0.0750(17) 0.0631(19) 0.0431(16) -0.0014(14) -0.0166(13) -0.0042(14)
C13 0.095(2) 0.076(2) 0.0433(18) -0.0022(15) -0.0235(15) -0.0133(16)
C14 0.0242(9) 0.0227(11) 0.0419(15) -0.0117(10) -0.0080(9) 0.0027(8)
C15 0.098(2) 0.058(2) 0.049(2) -0.0100(17) -0.0209(16) -0.0013(17)
N1 0.0269(8) 0.0180(8) 0.0337(11) -0.0080(8) -0.0057(7) 0.0003(6)
N2 0.0248(8) 0.0214(9) 0.0391(11) -0.0079(8) -0.0066(7) 0.0006(6)
N3 0.0263(8) 0.0185(9) 0.0368(11) -0.0104(8) -0.0078(7) 0.0007(6)
N4 0.0256(8) 0.0188(9) 0.0344(11) -0.0035(8) -0.0078(7) -0.0004(6)
N5 0.0390(9) 0.0220(10) 0.0377(13) -0.0057(9) -0.0030(8) 0.0005(7)
N6 0.0434(10) 0.0217(11) 0.0358(12) -0.0077(10) -0.0075(8) -0.0002(8)
O1 0.0449(8) 0.0224(8) 0.0456(10) -0.0128(7) -0.0076(7) 0.0004(6)
O2 0.0373(7) 0.0260(8) 0.0371(10) -0.0041(7) -0.0090(6) -0.0016(6)
O3 0.0370(7) 0.0230(8) 0.0362(10) -0.0080(7) -0.0098(6) 0.0011(6)
O4 0.0405(8) 0.0264(8) 0.0392(9) -0.0067(7) -0.0064(6) -0.0002(6)
O5 0.1018(16) 0.0747(15) 0.0517(15) -0.0281(12) -0.0202(12) 0.0296(12)
O6 0.0719(12) 0.0689(13) 0.0535(13) -0.0002(11) -0.0123(9) 0.0033(10)
 
_geom_special_details
;
 All esds (except the esd in the dihedral angle between two l.s. planes)
 are estimated using the full covariance matrix.  The cell esds are taken
 into account individually in the estimation of esds in distances, angles
 and torsion angles; correlations between esds in cell parameters are only
 used when they are defined by crystal symmetry.  An approximate (isotropic)
 treatment of cell esds is used for estimating esds involving l.s. planes.
;
 
loop_
 _geom_bond_atom_site_label_1
 _geom_bond_atom_site_label_2
 _geom_bond_distance
 _geom_bond_site_symmetry_2
 _geom_bond_publ_flag
C1 O1 1.231(2) . ?
C1 N4 1.376(3) . ?
C1 N1 1.391(2) . ?
C2 N2 1.334(2) . ?
C2 N1 1.389(2) . ?
C2 C5 1.404(3) . ?
C3 N5 1.315(3) . ?
C3 N2 1.355(2) . ?
C3 N3 1.375(3) . ?
C4 N6 1.314(3) . ?
C4 N3 1.362(2) . ?
C4 C5 1.428(3) . ?
C5 C6 1.429(3) . ?
C6 O2 1.242(2) . ?
C6 N4 1.392(2) . ?
C7 N1 1.478(3) . ?
C7 C8 1.520(3) . ?
C7 H7A 0.9900 . ?
C7 H7B 0.9900 . ?
C8 C9 1.527(3) . ?
C8 H8A 0.9900 . ?
C8 H8B 0.9900 . ?
C9 C10 1.523(3) . ?
C9 H9A 0.9900 . ?
C9 H9B 0.9900 . ?
C10 C11 1.518(3) . ?
C10 H10A 0.9900 . ?
C10 H10B 0.9900 . ?
C11 C12 1.524(3) . ?
C11 H11A 0.9900 . ?
C11 H11B 0.9900 . ?
C12 C13 1.529(4) . ?
C12 H12A 0.9900 . ?
C12 H12B 0.9900 . ?
C13 H13A 0.9800 . ?
C13 H13B 0.9800 . ?
C13 H13C 0.9800 . ?
C14 O4 1.247(2) . ?
C14 O3 1.267(2) . ?
C14 H14 0.9500 . ?
C15 O6 1.191(3) . ?
C15 O5 1.315(3) . ?
C15 H15 0.9500 . ?
N3 H3O 0.90(3) . ?
N4 H4N 0.97(3) . ?
N5 H5A 0.94(3) . ?
N5 H5B 0.88(3) . ?
N6 H6B 0.88(2) . ?
N6 H6A 0.90(3) . ?
O5 H5O 0.96(4) . ?
 
loop_
 _geom_angle_atom_site_label_1
 _geom_angle_atom_site_label_2
 _geom_angle_atom_site_label_3
 _geom_angle
 _geom_angle_site_symmetry_1
 _geom_angle_site_symmetry_3
 _geom_angle_publ_flag
O1 C1 N4 121.54(18) . . ?
O1 C1 N1 121.51(19) . . ?
N4 C1 N1 116.94(17) . . ?
N2 C2 N1 115.71(17) . . ?
N2 C2 C5 124.63(16) . . ?
N1 C2 C5 119.66(17) . . ?
N5 C3 N2 118.41(19) . . ?
N5 C3 N3 119.07(18) . . ?
N2 C3 N3 122.52(18) . . ?
N6 C4 N3 118.92(18) . . ?
N6 C4 C5 123.67(18) . . ?
N3 C4 C5 117.41(18) . . ?
C2 C5 C4 117.08(17) . . ?
C2 C5 C6 121.40(17) . . ?
C4 C5 C6 121.52(18) . . ?
O2 C6 N4 119.15(17) . . ?
O2 C6 C5 126.54(18) . . ?
N4 C6 C5 114.31(18) . . ?
N1 C7 C8 112.27(15) . . ?
N1 C7 H7A 109.1 . . ?
C8 C7 H7A 109.1 . . ?
N1 C7 H7B 109.1 . . ?
C8 C7 H7B 109.1 . . ?
H7A C7 H7B 107.9 . . ?
C7 C8 C9 112.74(16) . . ?
C7 C8 H8A 109.0 . . ?
C9 C8 H8A 109.0 . . ?
C7 C8 H8B 109.0 . . ?
C9 C8 H8B 109.0 . . ?
H8A C8 H8B 107.8 . . ?
C10 C9 C8 112.45(18) . . ?
C10 C9 H9A 109.1 . . ?
C8 C9 H9A 109.1 . . ?
C10 C9 H9B 109.1 . . ?
C8 C9 H9B 109.1 . . ?
H9A C9 H9B 107.8 . . ?
C11 C10 C9 116.00(19) . . ?
C11 C10 H10A 108.3 . . ?
C9 C10 H10A 108.3 . . ?
C11 C10 H10B 108.3 . . ?
C9 C10 H10B 108.3 . . ?
H10A C10 H10B 107.4 . . ?
C10 C11 C12 113.0(2) . . ?
C10 C11 H11A 109.0 . . ?
C12 C11 H11A 109.0 . . ?
C10 C11 H11B 109.0 . . ?
C12 C11 H11B 109.0 . . ?
H11A C11 H11B 107.8 . . ?
C11 C12 C13 113.7(2) . . ?
C11 C12 H12A 108.8 . . ?
C13 C12 H12A 108.8 . . ?
C11 C12 H12B 108.8 . . ?
C13 C12 H12B 108.8 . . ?
H12A C12 H12B 107.7 . . ?
C12 C13 H13A 109.5 . . ?
C12 C13 H13B 109.5 . . ?
H13A C13 H13B 109.5 . . ?
C12 C13 H13C 109.5 . . ?
H13A C13 H13C 109.5 . . ?
H13B C13 H13C 109.5 . . ?
O4 C14 O3 126.12(18) . . ?
O4 C14 H14 116.9 . . ?
O3 C14 H14 116.9 . . ?
O6 C15 O5 127.0(3) . . ?
O6 C15 H15 116.5 . . ?
O5 C15 H15 116.5 . . ?
C2 N1 C1 121.15(16) . . ?
C2 N1 C7 120.76(16) . . ?
C1 N1 C7 118.07(16) . . ?
C2 N2 C3 116.74(17) . . ?
C4 N3 C3 121.61(16) . . ?
C4 N3 H3O 113.8(16) . . ?
C3 N3 H3O 124.5(16) . . ?
C1 N4 C6 126.45(17) . . ?
C1 N4 H4N 117.8(14) . . ?
C6 N4 H4N 115.7(14) . . ?
C3 N5 H5A 118.3(15) . . ?
C3 N5 H5B 120.3(19) . . ?
H5A N5 H5B 121(3) . . ?
C4 N6 H6B 119.6(13) . . ?
C4 N6 H6A 120.8(15) . . ?
H6B N6 H6A 119(2) . . ?
C15 O5 H5O 114(2) . . ?
 
loop_
 _geom_torsion_atom_site_label_1
 _geom_torsion_atom_site_label_2
 _geom_torsion_atom_site_label_3
 _geom_torsion_atom_site_label_4
 _geom_torsion
 _geom_torsion_site_symmetry_1
 _geom_torsion_site_symmetry_2
 _geom_torsion_site_symmetry_3
 _geom_torsion_site_symmetry_4
 _geom_torsion_publ_flag
N2 C2 C5 C4 -0.7(2) . . . . ?
N1 C2 C5 C4 178.69(14) . . . . ?
N2 C2 C5 C6 179.68(15) . . . . ?
N1 C2 C5 C6 -0.9(2) . . . . ?
N6 C4 C5 C2 179.57(15) . . . . ?
N3 C4 C5 C2 0.0(2) . . . . ?
N6 C4 C5 C6 -0.8(2) . . . . ?
N3 C4 C5 C6 179.65(14) . . . . ?
C2 C5 C6 O2 179.47(15) . . . . ?
C4 C5 C6 O2 -0.1(3) . . . . ?
C2 C5 C6 N4 -0.7(2) . . . . ?
C4 C5 C6 N4 179.68(14) . . . . ?
N1 C7 C8 C9 -170.33(18) . . . . ?
C7 C8 C9 C10 -173.2(2) . . . . ?
C8 C9 C10 C11 -175.9(2) . . . . ?
C9 C10 C11 C12 -179.1(2) . . . . ?
C10 C11 C12 C13 178.3(2) . . . . ?
N2 C2 N1 C1 -177.36(14) . . . . ?
C5 C2 N1 C1 3.2(2) . . . . ?
N2 C2 N1 C7 1.0(2) . . . . ?
C5 C2 N1 C7 -178.42(14) . . . . ?
O1 C1 N1 C2 177.27(15) . . . . ?
N4 C1 N1 C2 -3.6(2) . . . . ?
O1 C1 N1 C7 -1.1(2) . . . . ?
N4 C1 N1 C7 177.96(14) . . . . ?
C8 C7 N1 C2 -78.7(2) . . . . ?
C8 C7 N1 C1 99.68(19) . . . . ?
N1 C2 N2 C3 -179.23(13) . . . . ?
C5 C2 N2 C3 0.2(2) . . . . ?
N5 C3 N2 C2 -179.31(15) . . . . ?
N3 C3 N2 C2 1.0(2) . . . . ?
N6 C4 N3 C3 -178.45(15) . . . . ?
C5 C4 N3 C3 1.1(2) . . . . ?
N5 C3 N3 C4 178.61(15) . . . . ?
N2 C3 N3 C4 -1.7(2) . . . . ?
O1 C1 N4 C6 -178.95(15) . . . . ?
N1 C1 N4 C6 1.9(2) . . . . ?
O2 C6 N4 C1 -179.98(15) . . . . ?
C5 C6 N4 C1 0.2(2) . . . . ?
 
_diffrn_measured_fraction_theta_max    0.953
_diffrn_reflns_theta_full              25.26
_diffrn_measured_fraction_theta_full   0.953
_refine_diff_density_max    0.327
_refine_diff_density_min   -0.344
_refine_diff_density_rms    0.064
